# Supplementary material
Source: PubMed Central journal article supplement (PMC4174944)
Supplement: 78fd29686ffe3bca35822ec34caa8692_genetics.114.165266-2.pdf [file 78fd29686ffe3bca35822ec34caa8692_genetics.114.165266-2.pdf]

DRB1 - 57 total pops

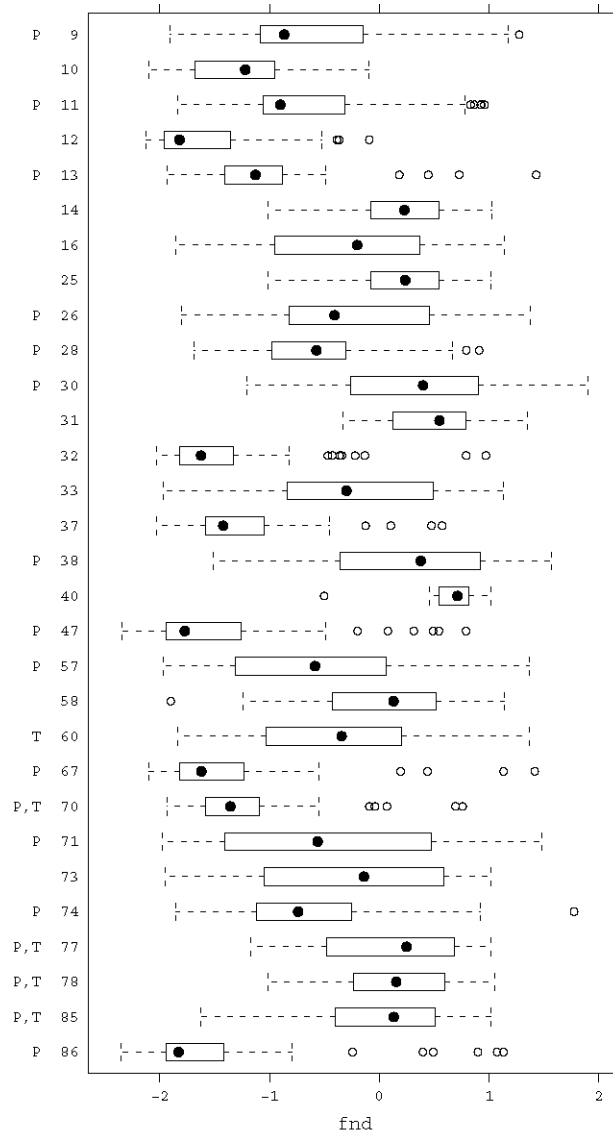

**Figure S1** Boxplots of  $F_{nd}$  values for *DRB1* Amino Acids 9 to 86 from 57 Populations (Lancaster 2006)\*

\*AA position is indicated on the vertical axis with P indicating a peptide interacting site and T indicating a T-cell interacting site. The boxes indicate the middle 50% of the  $F_{nd}$  values across the 57 populations with a line drawn at the median value. The spread of the central half of the data is called the interquartile range. Extreme observations that are more than 1.5 times the interquartile range away from the central box are identified with circles.
